# Supplementary material for: Effects of Hydroxyethyl Cellulose and Sulfated Rice Bran Polysaccharide Coating on Quality Maintenance of Cherry Tomatoes during Cold Storage
Source: MDPI journal article supplement (doi:10.3390/foods12173156), 2023-08-22
Supplement: s1 [file s1]

Table S1. Sensory evaluation of cherry tomatoes

|             | <b>color</b> | <b>flavour</b> | <b>mouthfeel<br/>texture</b> | <b>overall<br/>acceptability</b> |
|-------------|--------------|----------------|------------------------------|----------------------------------|
| CK          | 24.5±0.6     | 23.5±0.5       | 24.0±0.4                     | 23.0±0.6                         |
| HEC         | 23.5±0.3     | 23.5±0.2       | 24.0±0.2                     | 22.0±0.3                         |
| HEC-5%SRBP  | 22.5±0.8     | 23.5±0.7       | 24.0±0.7                     | 22.0±0.8                         |
| HEC-10%SRBP | 22.5±0.3     | 23.5±0.2       | 24.0±0.2                     | 22.0±0.3                         |
| HEC-15%SRBP | 22.0±0.8     | 23.5±0.7       | 24.0±0.7                     | 21.5±0.8                         |
| HEC-20%SRBP | 22.0±0.6     | 23.5±0.4       | 24.0±0.4                     | 21.5±0.6                         |
| HEC-25%SRBP | 10.5±0.8     | 22.0±0.7       | 21.5±0.7                     | 17.0±0.8                         |

Table S2. Effect of different treatments on volatile substances of cherry tomatoes

| Type of compound | Retention time /min | Aroma component | Storage time /d | content / $\mu\text{g}\cdot\text{kg}^{-1}$ |                     |                     |                     |
|------------------|---------------------|-----------------|-----------------|--------------------------------------------|---------------------|---------------------|---------------------|
|                  |                     |                 |                 | CK                                         | HEC                 | HEC-5%SRBP          | HEC-20%SRBP         |
| Aldehydes        | 17.53               | heptanal        | 0               | 2.13 <sup>a</sup>                          | 2.13 <sup>a</sup>   | 2.13 <sup>a</sup>   | 2.13 <sup>a</sup>   |
|                  |                     |                 | 3               | 2.31 <sup>a</sup>                          | 2.30 <sup>a</sup>   | 2.17 <sup>b</sup>   | 2.16 <sup>b</sup>   |
|                  |                     |                 | 6               | 5.39 <sup>d</sup>                          | 2.70 <sup>a</sup>   | 3.35 <sup>c</sup>   | 2.74 <sup>b</sup>   |
|                  |                     |                 | 9               | 4.39 <sup>c</sup>                          | 5.61 <sup>d</sup>   | 3.88 <sup>b</sup>   | 3.47 <sup>a</sup>   |
|                  |                     |                 | 12              | 3.22 <sup>a</sup>                          | 3.85 <sup>b</sup>   | 6.01 <sup>d</sup>   | 4.55 <sup>c</sup>   |
|                  |                     |                 | 15              | 2.10 <sup>a</sup>                          | 3.44 <sup>b</sup>   | 4.69 <sup>c</sup>   | 6.23 <sup>d</sup>   |
|                  | 23.84               | (E)-2- heptenal | 0               | —                                          | —                   | —                   | —                   |
|                  |                     |                 | 3               | 1.82 <sup>c</sup>                          | 1.77 <sup>b</sup>   | 1.76 <sup>b</sup>   | 1.46 <sup>a</sup>   |
|                  |                     |                 | 6               | 8.83 <sup>d</sup>                          | 5.47 <sup>c</sup>   | 4.83 <sup>b</sup>   | 4.01 <sup>a</sup>   |
|                  |                     |                 | 9               | 8.20 <sup>c</sup>                          | 8.96 <sup>d</sup>   | 6.94 <sup>a</sup>   | 7.20 <sup>b</sup>   |
|                  |                     |                 | 12              | 6.52 <sup>a</sup>                          | 6.84 <sup>b</sup>   | 9.27 <sup>d</sup>   | 8.43 <sup>c</sup>   |
|                  |                     |                 | 15              | 4.30 <sup>a</sup>                          | 5.55 <sup>b</sup>   | 5.72 <sup>c</sup>   | 9.54 <sup>d</sup>   |
|                  | 19.224              | (E)-2- hexenal  | 0               | 235.87 <sup>a</sup>                        | 235.87 <sup>a</sup> | 235.87 <sup>a</sup> | 235.87 <sup>a</sup> |
|                  |                     |                 | 3               | 121.04 <sup>a</sup>                        | 126.74 <sup>b</sup> | 126.95 <sup>b</sup> | 128.09 <sup>c</sup> |
|                  |                     |                 | 6               | 85.90 <sup>a</sup>                         | 89.83 <sup>b</sup>  | 93.34 <sup>c</sup>  | 95.73 <sup>d</sup>  |
|                  |                     |                 | 9               | 76.21 <sup>a</sup>                         | 79.46 <sup>b</sup>  | 82.33 <sup>c</sup>  | 83.15 <sup>d</sup>  |
|                  |                     |                 | 12              | 72.26 <sup>a</sup>                         | 77.73 <sup>b</sup>  | 78.76 <sup>b</sup>  | 80.09 <sup>c</sup>  |
|                  |                     |                 | 15              | 65.11 <sup>a</sup>                         | 73.52 <sup>b</sup>  | 73.53 <sup>b</sup>  | 74.90 <sup>d</sup>  |
|                  | 13.234              | n-Hexanal       | 0               | 161.4 <sup>a</sup>                         | 161.42 <sup>a</sup> | 161.42 <sup>a</sup> | 161.42 <sup>a</sup> |
|                  |                     |                 | 3               | 124.65 <sup>a</sup>                        | 127.84 <sup>b</sup> | 128.27 <sup>b</sup> | 128.91 <sup>b</sup> |
|                  |                     |                 | 6               | 75.06 <sup>a</sup>                         | 106.25 <sup>b</sup> | 109.91 <sup>c</sup> | 111.26 <sup>d</sup> |
|                  |                     |                 | 9               | 64.19 <sup>a</sup>                         | 88.56 <sup>b</sup>  | 89.27 <sup>c</sup>  | 90.78 <sup>d</sup>  |
|                  |                     |                 | 12              | 61.27 <sup>a</sup>                         | 79.534 <sup>b</sup> | 80.82 <sup>c</sup>  | 81.05 <sup>d</sup>  |
|                  |                     |                 | 15              | 54.15 <sup>a</sup>                         | 58.05 <sup>b</sup>  | 59.41 <sup>c</sup>  | 59.84 <sup>c</sup>  |
|                  | 26.53               | Nonanal         | 0               | 2.92 <sup>a</sup>                          | 2.92 <sup>a</sup>   | 2.92 <sup>a</sup>   | 2.92 <sup>a</sup>   |
|                  |                     |                 | 3               | 6.50 <sup>d</sup>                          | 4.91 <sup>c</sup>   | 4.48 <sup>b</sup>   | 3.39 <sup>a</sup>   |
|                  |                     |                 | 6               | 7.99 <sup>d</sup>                          | 5.72 <sup>c</sup>   | 5.68 <sup>b</sup>   | 3.90 <sup>a</sup>   |
|                  |                     |                 | 9               | 7.97 <sup>c</sup>                          | 8.04 <sup>d</sup>   | 5.83 <sup>b</sup>   | 5.04 <sup>a</sup>   |
|                  |                     |                 | 12              | 7.29 <sup>c</sup>                          | 6.33 <sup>b</sup>   | 8.23 <sup>d</sup>   | 6.00 <sup>a</sup>   |

|          |       |                      |    |                    |                    |                    |                    |
|----------|-------|----------------------|----|--------------------|--------------------|--------------------|--------------------|
|          |       |                      | 15 | 4.69 <sup>a</sup>  | 5.05 <sup>b</sup>  | 5.49 <sup>c</sup>  | 7.28 <sup>d</sup>  |
|          | 38.44 | Trans-2,4-Decadienal | 0  | —                  | —                  | —                  | —                  |
|          |       |                      | 3  | —                  | —                  | —                  | —                  |
|          |       |                      | 6  | —                  | —                  | —                  | —                  |
|          |       |                      | 9  | —                  | —                  | —                  | —                  |
|          |       |                      | 12 | —                  | —                  | —                  | —                  |
|          |       |                      | 15 | 3.36 <sup>b</sup>  | 2.88 <sup>a</sup>  | 2.98 <sup>a</sup>  | 2.86 <sup>a</sup>  |
|          | 30.92 | Benzaldehyde         | 0  | 28.44 <sup>a</sup> | 28.44 <sup>a</sup> | 28.44 <sup>a</sup> | 28.44 <sup>a</sup> |
|          |       |                      | 3  | 13.65 <sup>d</sup> | 12.81 <sup>c</sup> | 12.33 <sup>b</sup> | 10.81 <sup>a</sup> |
|          |       |                      | 6  | 10.49 <sup>b</sup> | 10.32 <sup>b</sup> | 8.50 <sup>a</sup>  | 8.40 <sup>a</sup>  |
|          |       |                      | 9  | 9.39 <sup>d</sup>  | 7.98 <sup>b</sup>  | 8.49 <sup>c</sup>  | 7.75 <sup>a</sup>  |
|          |       |                      | 12 | 8.77 <sup>d</sup>  | 7.55 <sup>b</sup>  | 8.41 <sup>c</sup>  | 7.34 <sup>a</sup>  |
|          |       |                      | 15 | 7.85 <sup>d</sup>  | 6.23 <sup>b</sup>  | 6.93 <sup>c</sup>  | 5.82 <sup>a</sup>  |
| Alcohols | 26.29 | cis-3-Hexenol        | 0  | 29.28 <sup>a</sup> | 29.28 <sup>a</sup> | 29.28 <sup>a</sup> | 29.28 <sup>a</sup> |
|          |       |                      | 3  | 23.19 <sup>a</sup> | 24.88 <sup>a</sup> | 24.61 <sup>a</sup> | 24.22 <sup>a</sup> |
|          |       |                      | 6  | 22.56 <sup>a</sup> | 23.50 <sup>a</sup> | 23.11 <sup>a</sup> | 22.75 <sup>a</sup> |
|          |       |                      | 9  | 22.13 <sup>a</sup> | 22.51 <sup>a</sup> | 22.70 <sup>a</sup> | 22.96 <sup>a</sup> |
|          |       |                      | 12 | 21.39 <sup>a</sup> | 22.03 <sup>a</sup> | 22.15 <sup>a</sup> | 22.25 <sup>a</sup> |
|          |       |                      | 15 | 10.18 <sup>a</sup> | 15.18 <sup>b</sup> | 16.64 <sup>c</sup> | 17.25 <sup>d</sup> |
|          | 18.81 | 2-Methyl-1-butanol   | 0  | 0.77 <sup>a</sup>  | 0.77 <sup>a</sup>  | 0.77 <sup>a</sup>  | 0.77 <sup>a</sup>  |
|          |       |                      | 3  | 1.12 <sup>a</sup>  | 0.98 <sup>a</sup>  | 0.87 <sup>a</sup>  | 0.81 <sup>a</sup>  |
|          |       |                      | 6  | 1.88 <sup>a</sup>  | 1.76 <sup>a</sup>  | 1.72 <sup>a</sup>  | 1.58 <sup>a</sup>  |
|          |       |                      | 9  | 3.56 <sup>a</sup>  | 3.47 <sup>a</sup>  | 3.32 <sup>a</sup>  | 3.19 <sup>a</sup>  |
|          |       |                      | 12 | 4.84 <sup>a</sup>  | 4.74 <sup>a</sup>  | 4.65 <sup>a</sup>  | 4.57 <sup>a</sup>  |
|          |       |                      | 15 | 7.54 <sup>c</sup>  | 7.24 <sup>b</sup>  | 4.68 <sup>a</sup>  | 4.65 <sup>a</sup>  |
|          | 40.67 | Phenethyl alcohol    | 0  | 13.06 <sup>a</sup> | 13.06 <sup>a</sup> | 13.06 <sup>a</sup> | 13.06 <sup>a</sup> |
|          |       |                      | 3  | 16.91 <sup>d</sup> | 14.85 <sup>c</sup> | 14.01 <sup>b</sup> | 13.23 <sup>a</sup> |
|          |       |                      | 6  | 25.20 <sup>d</sup> | 17.43 <sup>c</sup> | 15.73 <sup>b</sup> | 15.32 <sup>a</sup> |
|          |       |                      | 9  | 25.13 <sup>c</sup> | 26.43 <sup>d</sup> | 23.61 <sup>b</sup> | 18.34 <sup>a</sup> |
|          |       |                      | 12 | 13.01 <sup>a</sup> | 19.03 <sup>b</sup> | 28.88 <sup>d</sup> | 20.84 <sup>c</sup> |
|          |       |                      | 15 | 8.96 <sup>a</sup>  | 12.81 <sup>b</sup> | 16.45 <sup>c</sup> | 29.31 <sup>d</sup> |
|          | 20.74 | 1-Pentanol           | 0  | 3.43 <sup>a</sup>  | 3.43 <sup>a</sup>  | 3.43 <sup>a</sup>  | 3.43 <sup>a</sup>  |
|          |       |                      | 3  | 2.61 <sup>a</sup>  | 2.52 <sup>a</sup>  | 2.59 <sup>a</sup>  | 2.61 <sup>a</sup>  |
|          |       |                      | 6  | 2.68 <sup>a</sup>  | 2.61 <sup>a</sup>  | 2.68 <sup>a</sup>  | 2.58 <sup>a</sup>  |

|              |       |                     |    |                    |                    |                    |                    |
|--------------|-------|---------------------|----|--------------------|--------------------|--------------------|--------------------|
|              |       |                     | 9  | 3.50 <sup>a</sup>  | 3.56 <sup>a</sup>  | 3.59 <sup>a</sup>  | 3.54 <sup>a</sup>  |
|              |       |                     | 12 | 2.96 <sup>a</sup>  | 2.64 <sup>a</sup>  | 2.87 <sup>a</sup>  | 3.01 <sup>a</sup>  |
|              |       |                     | 15 | 2.56 <sup>a</sup>  | 2.55 <sup>a</sup>  | 2.63 <sup>b</sup>  | 2.74 <sup>c</sup>  |
|              | 28.51 | 1-Octen-3-ol        | 0  | 11.72 <sup>a</sup> | 11.72 <sup>a</sup> | 11.72 <sup>a</sup> | 11.72 <sup>a</sup> |
|              |       |                     | 3  | 10.41 <sup>c</sup> | 9.30 <sup>a</sup>  | 9.23 <sup>a</sup>  | 9.94 <sup>b</sup>  |
|              |       |                     | 6  | 8.28 <sup>a</sup>  | 8.69 <sup>c</sup>  | 8.38 <sup>b</sup>  | 9.53 <sup>d</sup>  |
|              |       |                     | 9  | 8.31 <sup>c</sup>  | 7.24 <sup>a</sup>  | 8.14 <sup>b</sup>  | 9.60 <sup>d</sup>  |
|              |       |                     | 12 | 8.86 <sup>d</sup>  | 6.69 <sup>a</sup>  | 6.87 <sup>b</sup>  | 7.87 <sup>c</sup>  |
|              |       |                     | 15 | 6.28 <sup>a</sup>  | 6.93 <sup>b</sup>  | 7.26 <sup>c</sup>  | 7.22 <sup>d</sup>  |
| Ketones      | 24.38 | Methylheptenone     | 0  | 2.35 <sup>a</sup>  | 2.35 <sup>a</sup>  | 2.35 <sup>a</sup>  | 2.35 <sup>a</sup>  |
|              |       |                     | 3  | 3.35 <sup>d</sup>  | 2.88 <sup>c</sup>  | 2.46 <sup>b</sup>  | 2.24 <sup>a</sup>  |
|              |       |                     | 6  | 3.64 <sup>d</sup>  | 3.48 <sup>c</sup>  | 3.23 <sup>b</sup>  | 2.32 <sup>a</sup>  |
|              |       |                     | 9  | 2.54 <sup>a</sup>  | 4.86 <sup>d</sup>  | 3.81 <sup>c</sup>  | 3.75 <sup>b</sup>  |
|              |       |                     | 12 | 2.02 <sup>a</sup>  | 2.49 <sup>b</sup>  | 4.93 <sup>d</sup>  | 4.17 <sup>c</sup>  |
|              |       |                     | 15 | 1.88 <sup>a</sup>  | 2.21 <sup>b</sup>  | 2.48 <sup>c</sup>  | 5.61 <sup>d</sup>  |
| Hydrocarbons | 20.76 | Sulforaphane        | 0  | —                  | —                  | —                  | —                  |
|              |       |                     | 3  | 3.42 <sup>a</sup>  | —                  | —                  | —                  |
|              |       |                     | 6  | 3.42 <sup>a</sup>  | —                  | —                  | —                  |
|              |       |                     | 9  | 3.31 <sup>a</sup>  | 3.48 <sup>b</sup>  | —                  | —                  |
|              |       |                     | 12 | 3.29 <sup>a</sup>  | 3.47 <sup>b</sup>  | 3.51 <sup>b</sup>  | —                  |
|              |       |                     | 15 | 3.3 <sup>a</sup>   | 3.45 <sup>b</sup>  | 3.52 <sup>c</sup>  | 3.55 <sup>c</sup>  |
|              | 20.40 | $\alpha$ -Terpinene | 0  | —                  | —                  | —                  | —                  |
|              |       |                     | 3  | —                  | —                  | —                  | —                  |
|              |       |                     | 6  | 3.42 <sup>a</sup>  | —                  | —                  | —                  |
|              |       |                     | 9  | 3.31 <sup>a</sup>  | 3.48 <sup>a</sup>  | —                  | —                  |
|              |       |                     | 12 | 3.29 <sup>a</sup>  | 3.47 <sup>b</sup>  | 3.51 <sup>b</sup>  | —                  |
|              |       |                     | 15 | 3.3 <sup>a</sup>   | 3.45 <sup>a</sup>  | 3.52 <sup>b</sup>  | 3.55 <sup>b</sup>  |
|              | 5.175 | 2-Methylheptane     | 0  | 1.24 <sup>a</sup>  | 1.23 <sup>a</sup>  | 1.24 <sup>a</sup>  | 1.24 <sup>a</sup>  |
|              |       |                     | 3  | 1.23 <sup>a</sup>  | 1.22 <sup>a</sup>  | 1.26 <sup>a</sup>  | 1.25 <sup>a</sup>  |
|              |       |                     | 6  | 1.24 <sup>a</sup>  | 1.24 <sup>a</sup>  | 1.27 <sup>a</sup>  | 1.24 <sup>a</sup>  |
|              |       |                     | 9  | 1.23 <sup>a</sup>  | 1.29 <sup>a</sup>  | 1.24 <sup>a</sup>  | 1.21 <sup>a</sup>  |
|              |       |                     | 12 | 1.25 <sup>a</sup>  | 1.27 <sup>a</sup>  | 1.26 <sup>a</sup>  | 1.26 <sup>a</sup>  |
|              |       |                     | 15 | 1.26 <sup>a</sup>  | 1.28 <sup>a</sup>  | 1.27 <sup>a</sup>  | 1.26 <sup>a</sup>  |
|              | 5.625 | n-octane            | 0  | 1.56 <sup>a</sup>  | 1.56 <sup>a</sup>  | 1.56 <sup>a</sup>  | 1.56 <sup>a</sup>  |

|        |       |                   |    |                   |                   |                   |                   |
|--------|-------|-------------------|----|-------------------|-------------------|-------------------|-------------------|
|        |       |                   | 3  | 1.44 <sup>b</sup> | 1.47 <sup>b</sup> | 1.25 <sup>a</sup> | 1.30 <sup>a</sup> |
|        |       |                   | 6  | 1.51 <sup>a</sup> | 1.54 <sup>a</sup> | 1.76 <sup>b</sup> | 1.56 <sup>a</sup> |
|        |       |                   | 9  | 1.61 <sup>a</sup> | 1.60 <sup>a</sup> | 1.69 <sup>a</sup> | 1.58 <sup>a</sup> |
|        |       |                   | 12 | 1.58 <sup>a</sup> | 1.62 <sup>b</sup> | 1.74 <sup>b</sup> | 1.59 <sup>a</sup> |
|        |       |                   | 15 | 1.49 <sup>a</sup> | 1.30 <sup>a</sup> | 1.56 <sup>a</sup> | 1.40 <sup>a</sup> |
| 5.663  |       | 2,3,5-            |    |                   |                   |                   |                   |
|        |       | Trimethylhexane   | 0  | 1.21 <sup>a</sup> | 1.21 <sup>a</sup> | 1.21 <sup>a</sup> | 1.21 <sup>a</sup> |
|        |       |                   | 3  | 1.18 <sup>a</sup> | 1.19 <sup>a</sup> | 1.17 <sup>a</sup> | 1.18 <sup>a</sup> |
|        |       |                   | 6  | 1.24 <sup>a</sup> | 1.23 <sup>a</sup> | 1.22 <sup>a</sup> | 1.26 <sup>a</sup> |
|        |       |                   | 9  | 1.24 <sup>a</sup> | 1.25 <sup>a</sup> | 1.28 <sup>a</sup> | 1.25 <sup>a</sup> |
|        |       |                   | 12 | 1.32 <sup>a</sup> | 1.33 <sup>a</sup> | 1.29 <sup>a</sup> | 1.30 <sup>a</sup> |
|        |       |                   | 15 | 1.31 <sup>a</sup> | 1.29 <sup>a</sup> | 1.27 <sup>a</sup> | 1.29 <sup>a</sup> |
| 8.792  |       | 2-Methylnonane    | 0  | 2.69 <sup>a</sup> | 2.69 <sup>a</sup> | 2.69 <sup>a</sup> | 2.69 <sup>a</sup> |
|        |       |                   | 3  | 2.64 <sup>a</sup> | 2.66 <sup>a</sup> | 2.65 <sup>a</sup> | 2.66 <sup>a</sup> |
|        |       |                   | 6  | 2.59 <sup>a</sup> | 2.61 <sup>a</sup> | 2.65 <sup>a</sup> | 2.64 <sup>a</sup> |
|        |       |                   | 9  | 2.56 <sup>a</sup> | 2.6 <sup>a</sup>  | 2.62 <sup>a</sup> | 2.63 <sup>a</sup> |
|        |       |                   | 12 | 2.59 <sup>a</sup> | 2.61 <sup>a</sup> | 2.65 <sup>a</sup> | 2.64 <sup>a</sup> |
|        |       |                   | 15 | 2.62 <sup>a</sup> | 2.63 <sup>a</sup> | 2.64 <sup>a</sup> | 2.62 <sup>a</sup> |
| <hr/>  |       |                   |    |                   |                   |                   |                   |
| Esters | 36.65 | Methyl salicylate | 0  | ——                | ——                | ——                | ——                |
|        |       |                   | 3  | 2.64 <sup>d</sup> | 0.68 <sup>a</sup> | 1.27 <sup>b</sup> | 1.52 <sup>c</sup> |
|        |       |                   | 6  | 3.56 <sup>d</sup> | 1.98 <sup>a</sup> | 2.71 <sup>c</sup> | 2.09 <sup>b</sup> |
|        |       |                   | 9  | 2.01 <sup>a</sup> | 3.78 <sup>d</sup> | 2.67 <sup>c</sup> | 2.44 <sup>b</sup> |
|        |       |                   | 12 | 1.84 <sup>a</sup> | 1.96 <sup>b</sup> | 3.56 <sup>d</sup> | 2.52 <sup>c</sup> |
|        |       |                   | 15 | 0.6 <sup>7a</sup> | 1.56 <sup>b</sup> | 1.67 <sup>c</sup> | 3.98 <sup>d</sup> |
| 7.09   |       | Ethyl acetate     | 0  | 0 <sup>a</sup>    | 0 <sup>a</sup>    | 0 <sup>a</sup>    | 0 <sup>a</sup>    |
|        |       |                   | 3  | 0 <sup>a</sup>    | 0 <sup>a</sup>    | 0 <sup>a</sup>    | 0 <sup>a</sup>    |
|        |       |                   | 6  | 0 <sup>a</sup>    | 0 <sup>a</sup>    | 0 <sup>a</sup>    | 0 <sup>a</sup>    |
|        |       |                   | 9  | 0 <sup>a</sup>    | 0 <sup>a</sup>    | 4.93 <sup>b</sup> | 3.91 <sup>a</sup> |
|        |       |                   | 12 | 0 <sup>a</sup>    | 0 <sup>a</sup>    | 3.43 <sup>a</sup> | 3.66 <sup>a</sup> |
|        |       |                   | 15 | 0 <sup>a</sup>    | 0 <sup>a</sup>    | 3.98 <sup>a</sup> | 3.86 <sup>a</sup> |

---

0 d

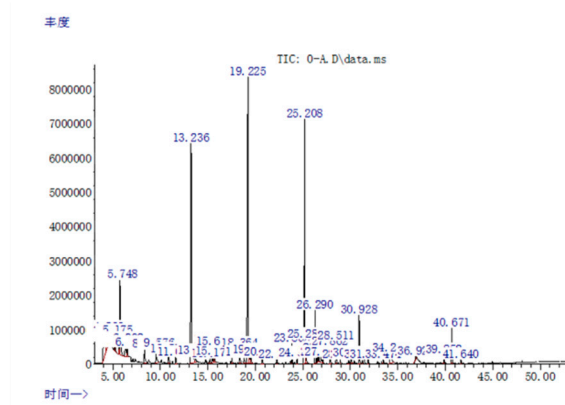

3 d

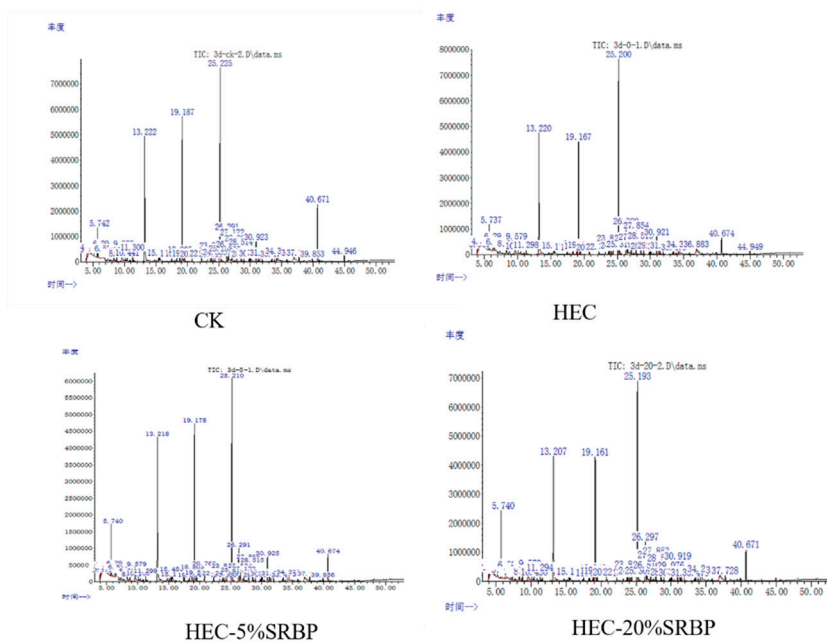

6 d

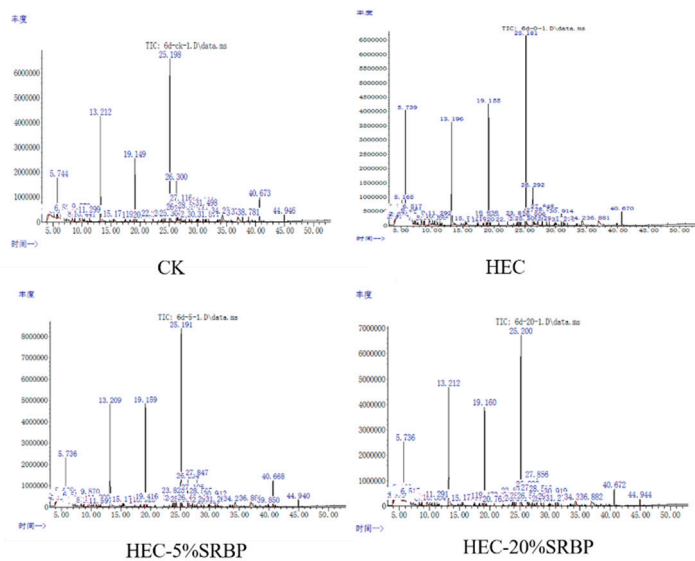

9 d

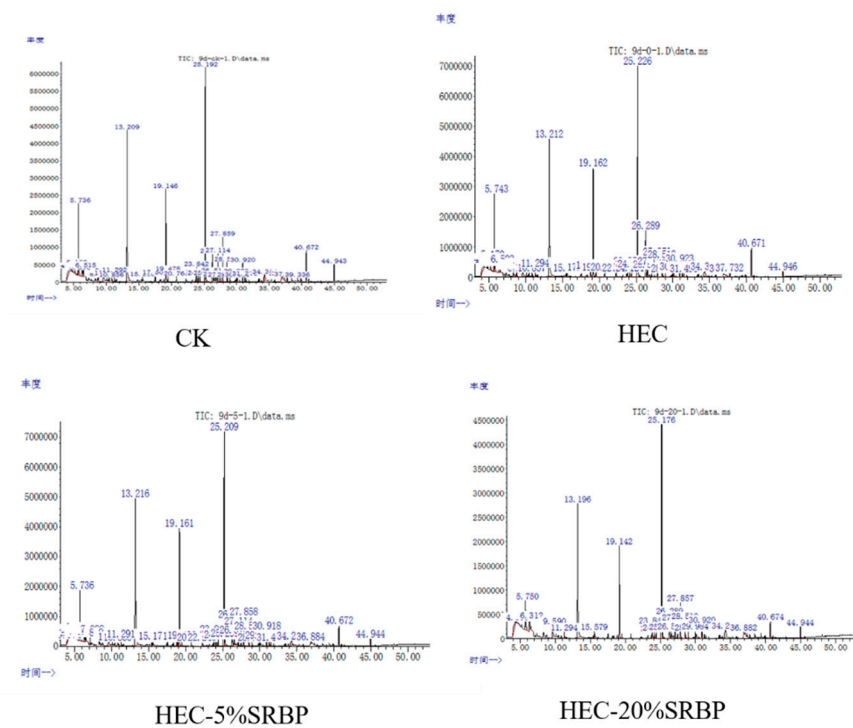

12 d

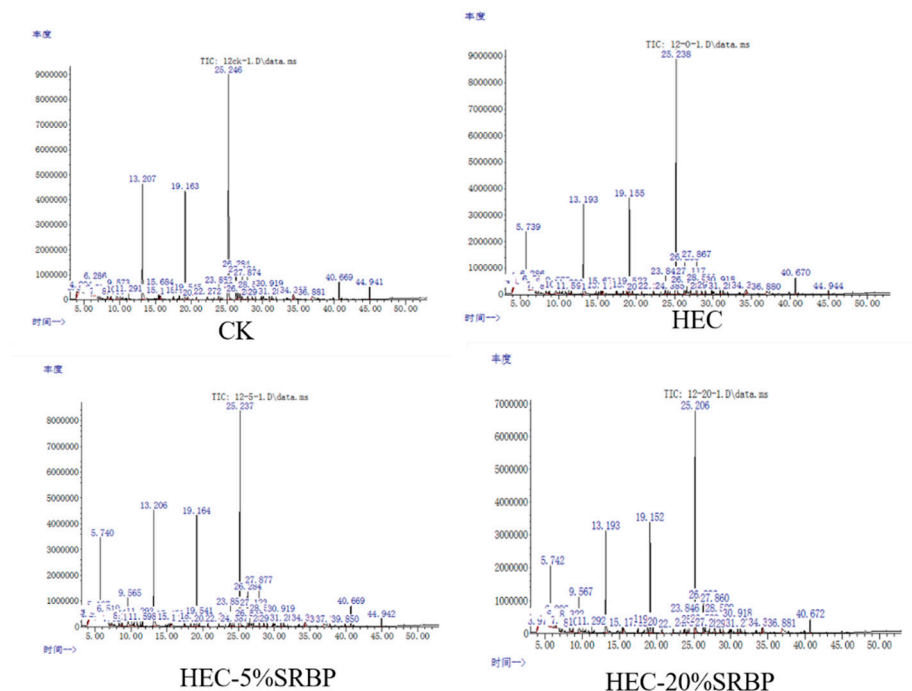

Figure S1. Chromatograms of volatiles substances at different times for different treatments

Table S3. The retention time of n-alkanes

| number | Retention time (min) | Match name  | item | Molecular weight (amu) | CAS         | Spectral library                                          |
|--------|----------------------|-------------|------|------------------------|-------------|-----------------------------------------------------------|
| 4      | 3.97                 | Pentane     |      | 72.094                 | 000109-66-0 | D:\GC-MS\GCMS Chemstation\ Raw data for testing \NIST08.L |
| 7      | 4.373                | Hexane      |      | 86.11                  | 000110-54-3 | D:\GC-MS\GCMS Chemstation\ Raw data for testing \NIST08.L |
| 21     | 7.432                | Nonane      |      | 128.157                | 000111-84-2 | D:\GC-MS\GCMS Chemstation\ Raw data for testing \NIST08.L |
| 25     | 10.245               | Decane      |      | 142.172                | 000124-18-5 | D:\GC-MS\GCMS Chemstation\ Raw data for testing \NIST08.L |
| 27     | 14.021               | Undecane    |      | 156.188                | 001120-21-4 | D:\GC-MS\GCMS Chemstation\ Raw data for testing \NIST08.L |
| 28     | 18.374               | Dodecane    |      | 170.203                | 000112-40-3 | D:\GC-MS\GCMS Chemstation\ Raw data for testing \NIST08.L |
| 30     | 22.849               | Tridecane   |      | 184.219                | 000629-50-5 | D:\GC-MS\GCMS Chemstation\ Raw data for testing \NIST08.L |
| 32     | 26.748               | Tetradecane |      | 198.235                | 000629-59-4 | D:\GC-MS\GCMS Chemstation\ Raw data for testing \NIST08.L |
| 36     | 30.025               | Pentadecane |      | 212.25                 | 000629-62-9 | D:\GC-MS\GCMS Chemstation\ Raw data for testing \NIST08.L |
| 42     | 32.897               | Hexadecane  |      | 226.266                | 000544-76-3 | D:\GC-MS\GCMS Chemstation\ Raw data for testing \NIST08.L |
| 49     | 35.483               | Heptadecane |      | 240.282                | 000629-78-7 | D:\GC-MS\GCMS Chemstation\ Raw data for testing \NIST08.L |



|    |        |            |         |             |                                                              |
|----|--------|------------|---------|-------------|--------------------------------------------------------------|
| 54 | 37.86  | Octadecane | 254.297 | 000593-45-3 | D:\GC-MS\GCMS Chemstation\ Raw<br>data for testing \NIST08.L |
| 57 | 40.08  | Nonadecane | 268.313 | 000629-92-5 | D:\GC-MS\GCMS Chemstation\ Raw<br>data for testing \NIST08.L |
| 63 | 42.165 | Eicosane   | 282.329 | 000112-95-8 | D:\GC-MS\GCMS Chemstation\ Raw<br>data for testing \NIST08.L |
